# Supplementary material for: Synthesis, structural characterization and biological evaluation of dinuclear gold(iii) complexes with aromatic nitrogen-containing ligands: antimicrobial activity in relation to the complex nuclearity
Source: Royal Society of Chemistry journal article supplement (doi:10.1039/c6md00214e), 2016-01-01
Supplement: c6md00214e1.pdf [file c6md00214e1.pdf]

**Synthesis, structural characterization and biological evaluation  
of dinuclear gold(III) complexes with aromatic nitrogen-  
containing ligands: antimicrobial activity in relation to the  
complex nuclearity**

Biljana Đ. Glišić,<sup>\*a</sup> Nada D. Savić,<sup>a</sup> Beata Warzajtis,<sup>b</sup> Lidija Djokic,<sup>c</sup> Tatjana Ilic-Tomic,<sup>c</sup>  
Marija Antić,<sup>a</sup> Slavko Radenković,<sup>a</sup> Jasmina Nikodinovic-Runic,<sup>c</sup> Urszula Rychlewska<sup>b</sup>  
and Miloš I. Djuran<sup>a</sup>

<sup>a</sup>*Department of Chemistry, Faculty of Science, University of Kragujevac, R. Domanovića  
12, PO Box 60, 34000 Kragujevac, Serbia*

<sup>b</sup>*Faculty of Chemistry, Adam Mickiewicz University, Umultowska 89B, 61-614 Poznań,  
Poland*

<sup>c</sup>*Institute of Molecular Genetics and Genetic Engineering, University of Belgrade, Vojvode  
Stepe 444a, 11000 Belgrade, Serbia*

<sup>\*</sup>Corresponding author. Tel.: +381 34 300 251; fax: +381 34 335 040 (B. Đ. Glišić).

*E-mail address:* [bglisic@kg.ac.rs](mailto:bglisic@kg.ac.rs) (B. Đ. Glišić).

**Abstract**

Dinuclear gold(III) complexes  $\{[\text{AuCl}_3]_2(\mu\text{-}4,4'\text{-bipy})\}$  (**1**) and  $\{[\text{AuCl}_3]_2(\mu\text{-bpe})\}$  (**2**) with bridging aromatic nitrogen-containing heterocyclic ligands, 4,4'-bipyridine (4,4'-bipy) and 1,2-bis(4-pyridyl)ethane (bpe), were synthesized and characterized by NMR ( $^1\text{H}$  and  $^{13}\text{C}$ ), UV-vis and IR spectroscopic techniques. The crystal structure of **1** was determined by single-crystal X-ray diffraction analysis, while DFT M06-2X method was applied in order to optimize the structures of **1** and **2**. A detailed mechanistic study was performed using the same DFT approach in order to shed light on disparate coordination modes of the presently investigated N-heterocyclic ligands and the monocyclic pyrazine, which contains two nitrogen atoms within one ring, toward the  $\text{AuCl}_3$  fragment. The investigation of the solution stability of **1** and **2** in DMSO revealed that both complexes were sufficiently stable in this solvent at room temperature. The complexes **1** and **2**, along with  $\text{K}[\text{AuCl}_4]$  and the N-heterocyclic ligands used for their synthesis, were evaluated by *in vitro* antimicrobial studies against a panel of the Gram-positive and Gram-negative bacteria and the fungus *Candida albicans*. In most cases, the complexes **1** and **2** have higher antibacterial activity than that of  $\text{K}[\text{AuCl}_4]$  (MICs for **1** and **2** were in the range  $3.9\text{-}62.5\ \mu\text{g mL}^{-1}$ ), while both of the N-heterocycles did not affect the bacterial growth at concentrations up to  $500\ \mu\text{g mL}^{-1}$ . On the other hand, the antifungal activity of these two complexes against *C. albicans* was moderate and lower than that of  $\text{K}[\text{AuCl}_4]$ . In order to determine the therapeutic potential of **1** and **2**, their antiproliferative effect on the normal human lung fibroblast cell line MRC5 and embryotoxicity on zebrafish (*Danio rerio*) have also been evaluated. To the best of our knowledge, complexes **1** and **2** are the first examples of dinuclear gold(III) complexes with aromatic six-membered heterocycles containing two nitrogen atoms as bridging ligands.

*Keywords:* Gold(III) complexes; Structural characterization; DFT calculations; Antibacterial activity; Cytotoxicity; *Danio rerio*

## TABLE OF CONTENTS

|                                                                                                                                                                                                                                                   |     |
|---------------------------------------------------------------------------------------------------------------------------------------------------------------------------------------------------------------------------------------------------|-----|
| <b>Crystal packing in 1</b>                                                                                                                                                                                                                       | S4  |
| <b>Fig. S1</b> Perspective view along the <i>b</i> -direction showing 3D supramolecular structure of <b>1</b> , stabilized by two most populated interactions; C–H···Cl (blue dashes) and C···Cl (beige dashes).                                  | S5  |
| <b>Fig. S2</b> Optimized geometries of the chemical species involved in the mechanism of formation of <b>2</b> obtained at the M06-2X/cc-PVTZ+LanL2TZ(f) level of theory.                                                                         | S6  |
| <b>Fig. S3</b> The structures involved in the mechanism of the reaction of [AuCl <sub>4</sub> ] <sup>-</sup> with pz obtained at the M06-2X/cc-PVTZ+LanL2TZ(f) level of theory.                                                                   | S7  |
| <b>Fig. S4</b> Air/light stability of the DMSO solutions of dinuclear gold(III) complexes <b>1</b> and <b>2</b> and the corresponding N-heterocyclic ligands.                                                                                     | S8  |
| <b>Table S1</b> Crucial interatomic distances (Å) in the structures involved in the mechanism of the reaction of [AuCl <sub>4</sub> ] <sup>-</sup> with 4,4'-bipy, bpe and pz calculated at the M06-2X/cc-PVTZ+LanL2TZ(f) level of theory         | S9  |
| <b>Table S2</b> NBO charges ( <i>e</i> ) on Au, N and Cl for the structures involved in the mechanism of the reaction of [AuCl <sub>4</sub> ] <sup>-</sup> with 4,4'-bipy, bpe and pz calculated at the M06-2X/cc-PVTZ+LanL2TZ(f) level of theory | S10 |
| <b>Table S3</b> Effect percentages for abnormal morphological characteristics evaluated in the zebrafish teratogenicity assay (FET) at 96 hpf                                                                                                     | S11 |
| <b>Table S4</b> Experimental details of <b>1</b>                                                                                                                                                                                                  | S12 |
| <b>Table S5</b> Lethal and teratogenic effects observed in zebrafish ( <i>Danio rerio</i> ) embryos at different hours post fertilization (hpf)                                                                                                   | S13 |

## Crystal packing in 1

Packing of molecules of **1** in crystal is mostly governed by multiple C–H···Cl interactions and of which C1–H1···Cl2 at  $1/2-x, -1/2-y, -z$  and C4–H4···Cl3 at  $1/2-x, 1/2+y, 1/2-z$  are the shortest (2.72 and 2.71 Å, respectively). There are also several short C···Cl contacts around the C1 and C2 atoms; the distance Cl3( $1/2-x, -1/2+y, 1/2-z$ )...C<sub>g</sub>(C1–C2) is only 3.178(6) Å (C<sub>g</sub> stands for the centre of gravity of the C1–C2 bond). According to the Hirshfeld surface analysis,<sup>1</sup> these two types of intermolecular interactions engage, respectively, 62.3 and 14.2% of the total molecular surface area. We could also identify relatively short Cl2...Cl2 ( $1-x, -y, -z$ ) contact of 3.302(3) Å, shorter than the sum of the van der Waals radii (3.40 Å),<sup>2</sup> which most likely is sterically enforced, and a pair of interionic Au1...Cl1 (at  $1/2-x, -1/2-y, -z$ ) contacts of 3.673(2) Å around an inversion centre. Although these latter contacts are longer than the sum of the corresponding van der Waals radii (3.41 Å), they contribute to the extension of the coordination number of the Au(III) ion to 5 and to the formation of centrosymmetric dimers.

- 1 S. K. Wolff, D. J. Grimwood, J. J. McKinnon, M. J. Turner, D. Jayatilaka and M. A. Spackman, CrystalExplorer 3.5, University of Western Australia, Crawley, Australia, 2012.
- 2 A. Bondi, *J. Phys. Chem.*, 1964, **68**, 441.

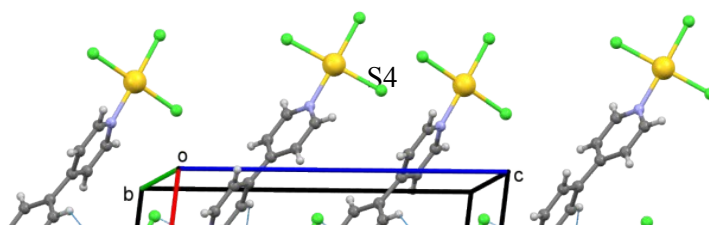

**Fig. S1** Perspective view along the *b*-direction showing 3D supramolecular structure of **1**, stabilized by two most populated interactions; C–H···Cl (blue dashes) and C···Cl (beige dashes).

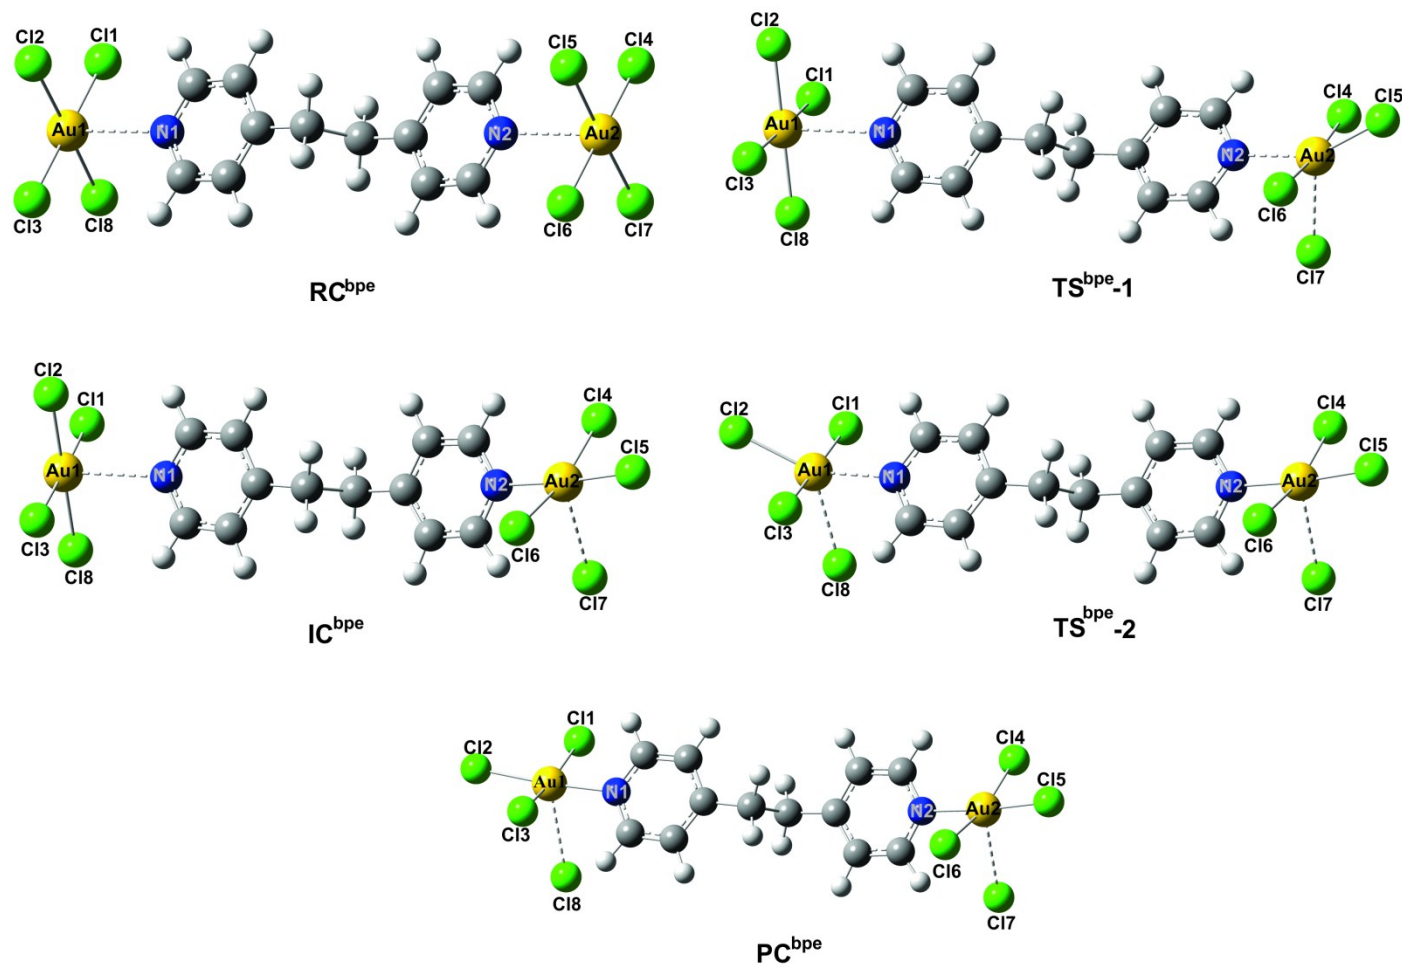

**Fig. S2** Optimized geometries of the chemical species involved in the mechanism of formation of **2** obtained at the M06-2X/cc-PVTZ+LanL2TZ(f) level of theory.

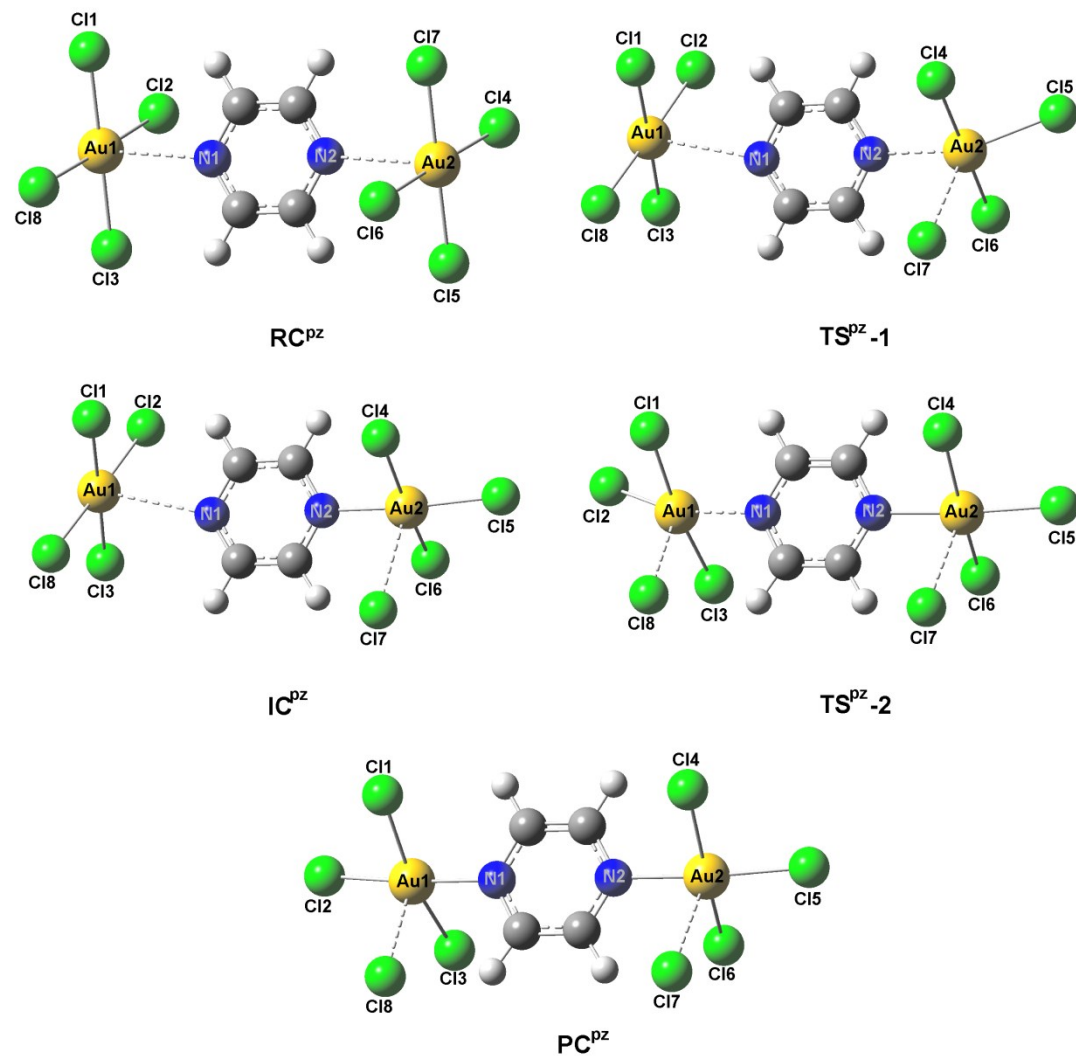

**Fig. S3** The structures involved in the mechanism of the reaction of  $[\text{AuCl}_4]^-$  with pz obtained at the M06-2X/cc-PVTZ+LanL2TZ(f) level of theory.

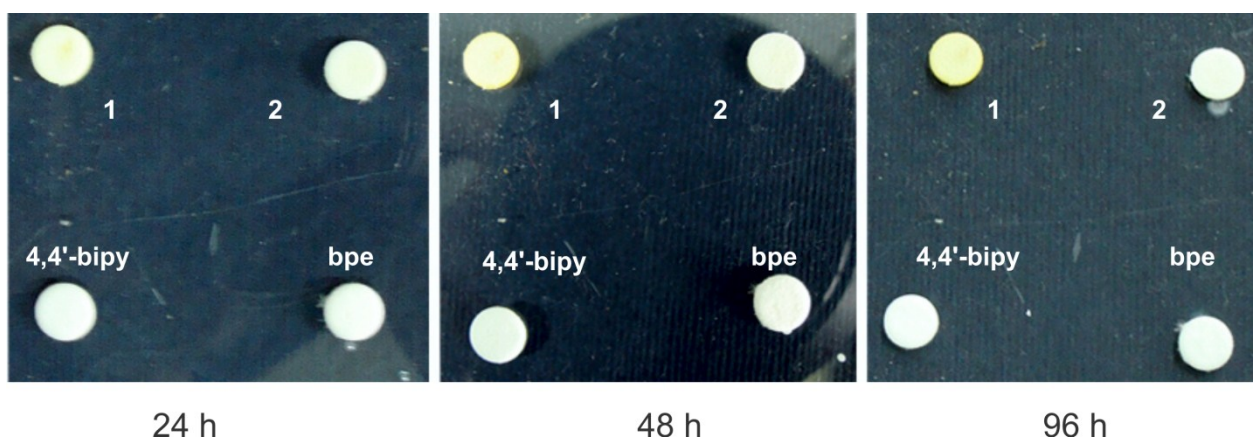

**Fig. S4** Air/light stability of the DMSO solutions of dinuclear gold(III) complexes **1** and **2** and the corresponding N-heterocyclic ligands.



**Table S1** Crucial interatomic distances (Å) in the structures involved in the mechanism of the reaction of  $[\text{AuCl}_4]^-$  with 4,4'-bipy, bpe and pz calculated at the M06-2X/cc-PVTZ+LanL2TZ(f) level of theory

|                            | Au1—N1 | Au1—Cl1 | Au1—Cl2 | Au1—Cl3 | Au1—Cl8 | Au2—N2 | Au2—Cl4 | Au2—Cl5 | Au2—Cl6 | Au2—Cl7 |
|----------------------------|--------|---------|---------|---------|---------|--------|---------|---------|---------|---------|
| <b>RC<sup>bipy</sup></b>   | 2.850  | 2.329   | 2.336   | 2.326   | 2.327   | 2.876  | 2.324   | 2.329   | 2.329   | 2.324   |
| <b>TS<sup>bipy-1</sup></b> | 2.872  | 2.328   | 2.328   | 2.324   | 2.323   | 2.310  | 2.311   | 2.325   | 2.317   | 2.725   |
| <b>IC<sup>bipy</sup></b>   | 2.851  | 2.327   | 2.325   | 2.326   | 2.326   | 2.084  | 2.339   | 2.284   | 2.344   | 2.915   |
| <b>TS<sup>bipy-2</sup></b> | 2.300  | 2.315   | 2.319   | 2.314   | 2.736   | 2.084  | 2.339   | 2.284   | 2.344   | 2.915   |
| <b>PC<sup>bipy</sup></b>   | 2.086  | 2.341   | 2.282   | 2.338   | 2.922   | 2.086  | 2.338   | 2.282   | 2.341   | 2.922   |
| <b>RC<sup>bpe</sup></b>    | 2.843  | 2.326   | 2.326   | 2.326   | 2.324   | 2.844  | 2.326   | 2.324   | 2.326   | 2.326   |
| <b>TS<sup>bpe-1</sup></b>  | 2.842  | 2.325   | 2.327   | 2.325   | 2.328   | 2.309  | 2.316   | 2.324   | 2.313   | 2.726   |
| <b>IC<sup>bpe</sup></b>    | 2.849  | 2.323   | 2.328   | 2.327   | 2.325   | 2.083  | 2.343   | 2.283   | 2.337   | 2.930   |
| <b>TS<sup>bpe-2</sup></b>  | 2.305  | 2.317   | 2.321   | 2.312   | 2.730   | 2.084  | 2.342   | 2.283   | 2.337   | 2.922   |
| <b>PC<sup>bpe</sup></b>    | 2.084  | 2.342   | 2.283   | 2.338   | 2.925   | 2.084  | 2.342   | 2.283   | 2.337   | 2.920   |
| <b>RC<sup>pz</sup></b>     | 2.903  | 2.328   | 2.325   | 2.324   | 2.326   | 2.904  | 2.326   | 2.328   | 2.325   | 2.324   |
| <b>TS<sup>pz-1</sup></b>   | 2.961  | 2.327   | 2.327   | 2.321   | 2.320   | 2.309  | 2.315   | 2.329   | 2.312   | 2.725   |
| <b>IC<sup>pz</sup></b>     | 2.971  | 2.326   | 2.329   | 2.320   | 2.318   | 2.083  | 2.341   | 2.288   | 2.337   | 2.924   |
| <b>TS<sup>pz-2</sup></b>   | 2.265  | 2.322   | 2.314   | 2.310   | 2.757   | 2.098  | 2.347   | 2.282   | 2.337   | 2.870   |
| <b>PC<sup>pz</sup></b>     | 2.104  | 2.348   | 2.280   | 2.336   | 2.863   | 2.104  | 2.348   | 2.280   | 2.336   | 2.862   |

**Table S2** NBO charges ( $e$ ) on Au, N and Cl for the structures involved in the mechanism of the reaction of  $[\text{AuCl}_4]^-$  with 4,4'-bipy, bpe and pz calculated at the M06-2X/cc-PVTZ+LanL2TZ(f) level of theory

|                            | $q_{\text{Au1}}$ | $q_{\text{N1}}$ | $q_{\text{Cl1}}$ | $q_{\text{Cl2}}$ | $q_{\text{Cl3}}$ | $q_{\text{Cl8}}$ | $q_{\text{Au2}}$ | $q_{\text{N2}}$ | $q_{\text{Cl4}}$ | $q_{\text{Cl5}}$ | $q_{\text{Cl6}}$ | $q_{\text{Cl7}}$ |
|----------------------------|------------------|-----------------|------------------|------------------|------------------|------------------|------------------|-----------------|------------------|------------------|------------------|------------------|
| <b>RC<sup>bipy</sup></b>   | 0.4643           | -0.5120         | -0.3790          | -0.3794          | -0.3786          | -0.3781          | 0.4639           | -0.5110         | -0.3788          | -0.3794          | -0.3780          | -0.3793          |
| <b>TS<sup>bipy-1</sup></b> | 0.4637           | -0.5078         | -0.3790          | -0.3791          | -0.3781          | -0.3777          | 0.5143           | -0.4939         | -0.3431          | -0.3394          | -0.3526          | -0.7286          |
| <b>IC<sup>bipy</sup></b>   | 0.4636           | -0.5042         | -0.3791          | -0.3784          | -0.3783          | -0.3795          | 0.5585           | -0.4850         | -0.3725          | -0.3396          | -0.3807          | -0.8150          |
| <b>TS<sup>bipy-2</sup></b> | 0.5166           | -0.4896         | -0.3438          | -0.3347          | -0.3515          | -0.7335          | 0.5585           | -0.4827         | -0.3796          | -0.3377          | -0.3727          | -0.8126          |
| <b>PC<sup>bipy</sup></b>   | 0.5580           | -0.4813         | -0.3782          | -0.3362          | -0.3720          | -0.8121          | 0.5581           | -0.4813         | -0.3719          | -0.3363          | -0.3781          | -0.8123          |
| <b>RC<sup>bpe</sup></b>    | 0.4620           | -0.5222         | -0.3790          | -0.3798          | -0.3795          | -0.3797          | 0.4620           | -0.5221         | -0.3795          | -0.3797          | -0.3790          | -0.3798          |
| <b>TS<sup>bpe-1</sup></b>  | 0.4616           | -0.5214         | -0.3799          | -0.3796          | -0.3796          | -0.3789          | 0.5135           | -0.4997         | -0.3530          | -0.3426          | -0.3457          | -0.7312          |
| <b>IC<sup>bpe</sup></b>    | 0.4625           | -0.5210         | -0.3794          | -0.3797          | -0.3793          | -0.3784          | 0.5597           | -0.4897         | -0.3822          | -0.3442          | -0.3736          | -0.8180          |
| <b>TS<sup>bpe-2</sup></b>  | 0.5141           | -0.4986         | -0.3453          | -0.3411          | -0.3538          | -0.7332          | 0.5584           | -0.4892         | -0.3737          | -0.3438          | -0.3820          | -0.8161          |
| <b>PC<sup>bpe</sup></b>    | 0.5578           | -0.4890         | -0.3819          | -0.3431          | -0.3737          | -0.8155          | 0.5587           | -0.4889         | -0.3813          | -0.3421          | -0.3743          | -0.8161          |
| <b>RC<sup>pz</sup></b>     | 0.5512           | -0.4130         | -0.3959          | -0.3979          | -0.3994          | -0.3965          | 0.5520           | -0.4130         | -0.3965          | -0.3960          | -0.3979          | -0.3994          |
| <b>TS<sup>pz-1</sup></b>   | 0.5526           | -0.3891         | -0.3980          | -0.3976          | -0.3935          | -0.3930          | 0.6111           | -0.4140         | -0.3660          | -0.3480          | -0.3578          | -0.7623          |
| <b>IC<sup>pz</sup></b>     | 0.5525           | -0.3758         | -0.3969          | -0.3988          | -0.3925          | -0.3909          | 0.6481           | -0.4051         | -0.3923          | -0.3461          | -0.3860          | -0.8471          |
| <b>TS<sup>pz-2</sup></b>   | 0.6187           | -0.3908         | -0.3700          | -0.3241          | -0.3537          | -0.7882          | 0.6401           | -0.3929         | -0.3922          | -0.3253          | -0.3796          | -0.8363          |
| <b>PC<sup>pz</sup></b>     | 0.6382           | -0.3884         | -0.3912          | -0.3191          | -0.3768          | -0.8336          | 0.6381           | -0.3883         | -0.3912          | -0.3191          | -0.3769          | -0.8335          |

**Table S3** Effect percentages for abnormal morphological characteristics evaluated in the zebrafish teratogenicity assay (FET) at 96 hpf

| Compound concentration | Dead embryos <sup>a</sup> | Teratogenic embryos <sup>a</sup> | Normal embryos <sup>a</sup> | Growth retardation <sup>b</sup> | Notochord <sup>b</sup> | Eyes <sup>b</sup> | Otoliths <sup>b</sup> | Pericardial edema <sup>b</sup> | Yolk edema <sup>b</sup> | Heart beat <sup>b</sup> | Blood circulation <sup>b</sup> | Unhatched <sup>b</sup> | Head malformation <sup>c</sup> | Skeletal deformities <sup>c</sup> |
|------------------------|---------------------------|----------------------------------|-----------------------------|---------------------------------|------------------------|-------------------|-----------------------|--------------------------------|-------------------------|-------------------------|--------------------------------|------------------------|--------------------------------|-----------------------------------|
| <b>1</b>               |                           |                                  |                             |                                 |                        |                   |                       |                                |                         |                         |                                |                        |                                |                                   |
| 50 µg/mL               | 90.00                     | 10.00                            | 0.00                        | 0.00                            | 0.00                   | 0.00              | 0.00                  | 0.00                           | 0.00                    | 0.00                    | 0.00                           | 100.00                 | *                              | *                                 |
| 40 µg/mL               | 30.00                     | 70.00                            | 0.00                        | 0.00                            | 0.00                   | 0.00              | 0.00                  | 0.00                           | 0.00                    | 0.00                    | 0.00                           | 100.00                 | *                              | *                                 |
| 30 µg/mL               | 10.00                     | 90.00                            | 0.00                        | 0.00                            | 0.00                   | 0.00              | 0.00                  | 0.00                           | 0.00                    | 0.00                    | 0.00                           | 100.00                 | *                              | *                                 |
| 20 µg/mL               | 0.00                      | 46.67                            | 53.33                       | 0.00                            | 0.00                   | 0.00              | 0.00                  | 0.00                           | 0.00                    | 0.00                    | 0.00                           | 53.33                  | 0.00                           | 0.00                              |
| 10 µg/mL               | 0.00                      | 0.00                             | 100.00                      | 0.00                            | 0.00                   | 0.00              | 0.00                  | 0.00                           | 0.00                    | 0.00                    | 0.00                           | 0.00                   | 0.00                           | 0.00                              |
| 5 µg/mL                | 0.00                      | 0.00                             | 100.00                      | 0.00                            | 0.00                   | 0.00              | 0.00                  | 0.00                           | 0.00                    | 0.00                    | 0.00                           | 0.00                   | 0.00                           | 0.00                              |
| <b>4,4'-bipy</b>       |                           |                                  |                             |                                 |                        |                   |                       |                                |                         |                         |                                |                        |                                |                                   |
| 50 µg/mL               | 100.00                    | 0.00                             | 0.00                        | -                               | -                      | -                 | -                     | -                              | -                       | -                       | -                              | -                      | -                              | -                                 |
| 40 µg/mL               | 100.00                    | 0.00                             | 0.00                        | -                               | -                      | -                 | -                     | -                              | -                       | -                       | -                              | -                      | -                              | -                                 |
| 30 µg/mL               | 100.00                    | 0.00                             | 0.00                        | -                               | -                      | -                 | -                     | -                              | -                       | -                       | -                              | -                      | -                              | -                                 |
| 20 µg/mL               | 80.00                     | 20.00                            | 0.00                        | 100.00                          | 0.00                   | 0.00              | 0.00                  | 100.00                         | 100.00                  | 0.00                    | 100.00                         | 66.67                  | 100.00                         | 100.00                            |
| 10 µg/mL               | 0.00                      | 0.00                             | 100.00                      | 0.00                            | 0.00                   | 0.00              | 0.00                  | 0.00                           | 0.00                    | 0.00                    | 0.00                           | 0.00                   | 0.00                           | 0.00                              |
| 5 µg/mL                | 0.00                      | 0.00                             | 100.00                      | 0.00                            | 0.00                   | 0.00              | 0.00                  | 0.00                           | 0.00                    | 0.00                    | 0.00                           | 0.00                   | 0.00                           | 0.00                              |
| <b>2</b>               |                           |                                  |                             |                                 |                        |                   |                       |                                |                         |                         |                                |                        |                                |                                   |
| 100 µg/mL              | 100.00                    | 0.00                             | 0.00                        | -                               | -                      | -                 | -                     | -                              | -                       | -                       | -                              | -                      | -                              | -                                 |
| 80 µg/mL               | 40.00                     | 0.00                             | 60.00                       | 0.00                            | 0.00                   | 0.00              | 0.00                  | 0.00                           | 0.00                    | 0.00                    | 0.00                           | 0.00                   | 0.00                           | 0.00                              |
| 60 µg/mL               | 6.67                      | 0.00                             | 93.33                       | 0.00                            | 0.00                   | 0.00              | 0.00                  | 0.00                           | 0.00                    | 0.00                    | 0.00                           | 0.00                   | 0.00                           | 0.00                              |
| 50 µg/mL               | 0.00                      | 0.00                             | 100.00                      | 0.00                            | 0.00                   | 0.00              | 0.00                  | 0.00                           | 0.00                    | 0.00                    | 0.00                           | 0.00                   | 0.00                           | 0.00                              |
| 40 µg/mL               | 0.00                      | 0.00                             | 100.00                      | 0.00                            | 0.00                   | 0.00              | 0.00                  | 0.00                           | 0.00                    | 0.00                    | 0.00                           | 0.00                   | 0.00                           | 0.00                              |
| 20 µg/mL               | 0.00                      | 0.00                             | 100.00                      | 0.00                            | 0.00                   | 0.00              | 0.00                  | 0.00                           | 0.00                    | 0.00                    | 0.00                           | 0.00                   | 0.00                           | 0.00                              |
| 10 µg/mL               | 0.00                      | 0.00                             | 100.00                      | 0.00                            | 0.00                   | 0.00              | 0.00                  | 0.00                           | 0.00                    | 0.00                    | 0.00                           | 0.00                   | 0.00                           | 0.00                              |
| 5 µg/mL                | 0.00                      | 0.00                             | 100.00                      | 0.00                            | 0.00                   | 0.00              | 0.00                  | 0.00                           | 0.00                    | 0.00                    | 0.00                           | 0.00                   | 0.00                           | 0.00                              |
| <b>bpe</b>             |                           |                                  |                             |                                 |                        |                   |                       |                                |                         |                         |                                |                        |                                |                                   |
| 100 µg/mL              | 10.00                     | 90.00                            | 0.00                        | 100.00                          | 0.00                   | 0.00              | 0.00                  | 100.00                         | 0.00                    | 0.00                    | 0.00                           | 0.00                   | 0.00                           | 88.89                             |
| 80 µg/mL               | 0.00                      | 100.00                           | 0.00                        | 100.00                          | 0.00                   | 0.00              | 0.00                  | 100.00                         | 0.00                    | 0.00                    | 0.00                           | 0.00                   | 0.00                           | 73.33                             |
| 60 µg/mL               | 0.00                      | 60.00                            | 40.00                       | 60.00                           | 0.00                   | 0.00              | 0.00                  | 60.00                          | 0.00                    | 0.00                    | 0.00                           | 0.00                   | 0.00                           | 60.00                             |
| 50 µg/mL               | 0.00                      | 30.00                            | 70.00                       | 30.00                           | 0.00                   | 0.00              | 0.00                  | 30.00                          | 0.00                    | 0.00                    | 0.00                           | 0.00                   | 0.00                           | 0.00                              |
| 40 µg/mL               | 0.00                      | 20.00                            | 80.00                       | 0.00                            | 0.00                   | 0.00              | 0.00                  | 20.00                          | 0.00                    | 0.00                    | 0.00                           | 0.00                   | 0.00                           | 0.00                              |
| 20 µg/mL               | 0.00                      | 0.00                             | 100.00                      | 0.00                            | 0.00                   | 0.00              | 0.00                  | 0.00                           | 0.00                    | 0.00                    | 0.00                           | 0.00                   | 0.00                           | 0.00                              |
| 10 µg/mL               | 0.00                      | 0.00                             | 100.00                      | 0.00                            | 0.00                   | 0.00              | 0.00                  | 0.00                           | 0.00                    | 0.00                    | 0.00                           | 0.00                   | 0.00                           | 0.00                              |
| 5 µg/mL                | 0.00                      | 0.00                             | 100.00                      | 0.00                            | 0.00                   | 0.00              | 0.00                  | 0.00                           | 0.00                    | 0.00                    | 0.00                           | 0.00                   | 0.00                           | 0.00                              |

Abbreviation used: (hpf) hours post fertilization; (-) data not available due to 100% mortality; (\*) data not assessed because the embryos hatching has been prevented.; <sup>a</sup>Percentage of mortality based on all eggs;

<sup>b</sup>Percentage of teratogenic effect based on all alive embryos at the time of assessment; <sup>c</sup>Percentage of teratogenic effect based on all alive hatched embryos at the time of assessment.

**Table S4** Experimental details of **1**

| Crystal data                                                               |                                                                               |
|----------------------------------------------------------------------------|-------------------------------------------------------------------------------|
| Chemical formula                                                           | C <sub>10</sub> H <sub>8</sub> Au <sub>2</sub> Cl <sub>6</sub> N <sub>2</sub> |
| $M_r$                                                                      | 762.82                                                                        |
| Crystal system, space group                                                | Monoclinic, <i>C2/c</i>                                                       |
| Temperature (K)                                                            | 130                                                                           |
| $a, b, c$ (Å)                                                              | 16.2461 (6), 7.5152 (3), 14.1846 (5)                                          |
| $\beta$ (°)                                                                | 97.938 (3)                                                                    |
| $V$ (Å <sup>3</sup> )                                                      | 1715.24 (11)                                                                  |
| $Z$                                                                        | 4                                                                             |
| Radiation type                                                             | Mo $K\alpha$                                                                  |
| $\mu$ (mm <sup>-1</sup> )                                                  | 18.01                                                                         |
| Crystal size (mm)                                                          | 0.10 × 0.10 × 0.02                                                            |
| Data collection                                                            |                                                                               |
| Diffractometer                                                             | Xcalibur                                                                      |
| Absorption correction                                                      | Analytical                                                                    |
| $T_{\min}, T_{\max}$                                                       | 0.177, 0.574                                                                  |
| No. of measured, independent and observed [ $I > 2\sigma(I)$ ] reflections | 12813, 1517, 1419                                                             |
| $R_{\text{int}}$                                                           | 0.035                                                                         |
| $(\sin \theta/\lambda)_{\text{max}}$ (Å <sup>-1</sup> )                    | 0.595                                                                         |
| Refinement                                                                 |                                                                               |
| $R[F^2 > 2\sigma(F^2)], wR(F^2), S$                                        | 0.019, 0.049, 1.20                                                            |
| No. of reflections                                                         | 1517                                                                          |
| No. of parameters                                                          | 91                                                                            |
| H-atom treatment                                                           | H-atom parameters constrained                                                 |
| $\Delta\rho_{\text{max}}, \Delta\rho_{\text{min}}$ (e Å <sup>-3</sup> )    | 1.02, -0.45                                                                   |

**Table S5** Lethal and teratogenic effects observed in zebrafish (*Danio rerio*) embryos at different hours post fertilization (hpf)

| Category           | Developmental endpoints                       | Exposure time (hpf) |    |    |    |
|--------------------|-----------------------------------------------|---------------------|----|----|----|
|                    |                                               | 24                  | 48 | 72 | 96 |
| Lethal effect      | Egg coagulation <sup>a</sup>                  | •                   | •  | •  | •  |
|                    | No somite formation                           | •                   | •  | •  | •  |
|                    | Tail not detached                             | •                   | •  | •  | •  |
|                    | No heartbeat                                  |                     | •  | •  | •  |
| Teratogenic effect | Malformation of head                          | •                   | •  | •  | •  |
|                    | Malformation of eyes <sup>b</sup>             | •                   | •  | •  | •  |
|                    | Malformation of sacculi/otoliths <sup>c</sup> | •                   | •  | •  | •  |
|                    | Malformation of chorda                        | •                   | •  | •  | •  |
|                    | Malformation of tail <sup>d</sup>             | •                   | •  | •  | •  |
|                    | Scoliosis                                     | •                   | •  | •  | •  |
|                    | Heartbeat frequency                           |                     | •  | •  | •  |
|                    | Blood circulation                             |                     | •  | •  | •  |
|                    | Pericardial edema                             | •                   | •  | •  | •  |
|                    | Yolk edema                                    | •                   | •  | •  | •  |
|                    | Yolk deformation                              | •                   | •  | •  | •  |
|                    | Growth retardation <sup>e</sup>               | •                   | •  | •  | •  |

<sup>a</sup>No clear organs structure is recognized.

<sup>b</sup>Malformation of eyes was recorded for the retardation in eye development and abnormality in shape and size.

<sup>c</sup>Presence of no, one or more than two otoliths per sacculus, as well as reduction and enlargement of otoliths and/or sacculi (otic vesicles).

<sup>d</sup>Tail malformation was recorded when the tail was bent, twisted or shorter than to control embryos as assessed by optical comparison.

<sup>e</sup>Growth retardation was recorded by comparing with the control embryos in development or size (before hatching, at 24 hpf and 48 hpf) or in a body length (after hatching, at and onwards 72 hpf) by optical comparison using a inverted microscope (CKX41; Olympus, Tokyo, Japan).
